# Supplementary material for: A motivational interview intervention delivered at home to improve the oral health literacy and reduce the morbidity of Chilean disadvantaged families: a study protocol for a community trial
Source: PubMed Central journal article supplement — BMJ Open. 2017 Jul 13;7(7):e011819. doi: 10.1136/bmjopen-2016-011819 (PMC5577873; doi:10.1136/bmjopen-2016-011819), 2017-07-13
Supplement: bmjopen-2016-011819supp001.pdf [file bmjopen-2016-011819supp001.pdf]

Investigador Principal: Ricardo Cartes Velásquez  
Organización: Departamento de Prevención y Salud Pública Odontológica, Universidad de Concepción  
Patrocinador: FONIS  
Proyecto: "Evaluación de una intervención de promoción en salud bucal desarrollada en el núcleo familiar de preescolares en sectores vulnerables urbanos. San Pedro de la Paz y Talcahuano. Ensayo comunitario."

Este Documento de Consentimiento Informado tiene dos partes:

- Información (proporciona información sobre el estudio)
- Formulario de Consentimiento (para firmar si está de acuerdo en participar)

Se le dará una copia del Documento completo de Consentimiento Informado como garantía de las condiciones de la participación de su institución.

## PARTE I: Información

**Introducción** Mi nombre es Ricardo Cartes, dentista y docente del Departamento de Prevención y Salud Pública Odontológica, Universidad de Concepción, soy el investigador principal de un Proyecto de Investigación sobre el efecto de una intervención de promoción en salud bucal sobre la incidencia de caries después de un año, al cual le invita a participar.

**Propósito** Este estudio tiene como objetivo determinar el impacto sanitario medido a través de la incidencia de caries y niveles de alfabetismo en salud bucal luego de 12 meses de una intervención de promoción en salud bucal desarrollada en el núcleo familiar de preescolares en el sector de Boca Sur de San Pedro de la Paz en comparación a un grupo control en el sector Los Cerros de Talcahuano.

**Tipo de Intervención** La intervención de este proyecto consiste en 4 a 6 visitas domiciliarias con las siguientes características:

- Las visitas son realizadas siguiendo los lineamientos de la Entrevista Motivacional (EM) que busca la generación de motivos y metas por parte del mismo paciente y no la entrega de consejos por el agente sanitario.
- El desarrollo de la EM durante las visitas se ajustará a las necesidades de las propias familias con una cobertura mínima de los contenidos de: autocuidado en salud bucal y atención en el nivel de atención primaria de salud.
- Las visitas serán realizadas por 2 parejas conformadas por 2 técnicos en odontología previamente capacitados en la técnica de EM para salud bucal.
- Las visitas tienen una duración de 20 a 60 minutos.
- La primera visita se realizará durante las 3 semanas iniciales la intervención, las restantes visitas (3 a 5) serán acordadas con cada familia con una separación mínima de 1 semana y máxima de 2 semanas entre ellas.
- El horario y días de las visitas se ajustará a la disponibilidad de las familias intentando asegurar la participación de la mayor cantidad de padres y/o apoderados a cargo del preescolar, dentro de un horario de 8.00 a 21.00 horas de lunes a sábado.

**Selección de participantes** Se invitará a todos los preescolares y sus familias que residan en los sectores de Boca Sur en San Pedro de La Paz y Los Cerros en Talcahuano.

**Participación Voluntaria** Su participación será de carácter voluntario, mediado por un proceso de consentimiento informado.

**Duración** El proyecto tendrá una duración de 2 años, en los que deberá participar en un examen completo de su salud bucal y conocimientos, en 4 a 6 intervenciones de promoción y luego de 12 meses en un nuevo control de su salud bucal y conocimientos.

**Riesgos** Esta investigación no implica riesgos en contra de su bienestar físico o mental.

**Beneficios** Los beneficios serán mejorar su nivel de conocimientos y niveles de salud bucal, derivados de los resultados se podrán implementar programas que benefician a toda la población preescolar nacional y sus familias.

**Incentivos** Los participantes (no) recibirán retribución económica por su participación.

**Confidencialidad** se le solicitará identificarse con su RUT para relacionar los datos de las distintas encuestas, pero su confidencialidad será resguardada codificando la identidad de todos los participantes, la que sólo será conocida por el Investigador Principal y no será considerada durante el procesamiento de los datos ni en ningún otro momento. Además, los datos serán almacenados en ordenadores resguardados con clave.

**Difusión de los Resultados** Las publicaciones generadas a partir del proyecto, mantendrá el anonimato de la identidad de todos los estudiantes e instituciones participantes. Se le proporcionará un resumen ejecutivo si Ud. lo solicita.

**Derecho a negarse o retirarse** El rechazo a participar o el retiro en cualquier momento de la investigación no tendrán ningún tipo de castigo o consecuencia.

**A Quién Contactar** Cualquier pregunta respecto al desarrollo de la investigación o sobre los resultados de ésta, parcial o final, puede contactar con el investigador principal **Ricardo Cartes**, (*correo electrónico*: rcartes@udec.cl; *fono*: 41-2204386).

**PARTE II: Formulario de Consentimiento**

He sido invitado(a) a participar en una investigación, enmarcada en el proyecto FONIS N° SA14ID0162 titulado ***“Evaluación de una intervención de promoción en salud bucal desarrollada en el núcleo familiar de preescolares en sectores vulnerables urbanos. San Pedro de la Paz y Talcahuano. Ensayo comunitario. percepción del Clima académico en el ciclo clínico de Odontología de la UdeC”***, cuyo investigador es el Dr. Ricardo Cartes y que tiene como objetivo determinar el impacto en los conocimientos y salud bucal de una intervención de promoción en salud bucal desarrollada en el núcleo familiar de preescolares en el sector de Boca Sur de San Pedro de la Paz en comparación a un grupo control en el sector Los Cerros de Talcahuano.

Por este motivo, se requiere mi participación respondiendo encuestas y completando un examen de salud bucal al inicio y al término del proyecto, así como participando en 4 a 6 intervenciones de promoción en mi hogar.

Asimismo, declaro que se me informó que mi participación será de carácter voluntario y mediado por un proceso de consentimiento informado. Para poder parear mis respuestas de las distintas, se solicita que me identifique con mi RUT al inicio de cada instrumento. No obstante, los investigadores se comprometen a que la información que entregaré en estos instrumentos sólo será utilizada para responder a los objetivos de este estudio, será confidencial, que los datos serán manejados exclusivamente por los investigadores, almacenados en ordenadores resguardados con clave y que en ningún caso serán analizados individualmente, pues a este estudio sólo le interesan el efecto a nivel general de la intervención en promoción.

En este mismo sentido, sólo se me hará entrega, si lo solicito, de un resumen ejecutivo con los resultados generales del estudio sin identificar a los participantes.

También se me ha garantizado que el estudio no implica exponerme a situaciones que atenten en contra de mi bienestar físico o mental y que no perjudicará mi atención en salud.

Si en algún momento siento que el proceso de encuestaje me incomoda puedo solicitar que se detenga inmediatamente la recolección.

Estoy al tanto que la participación que se me solicita es voluntaria, que no recibiré pago alguno por mi colaboración y que puedo negarme a participar o retirarme en cualquier etapa de la investigación, sin necesidad de dar explicaciones y que esto no tendrá ningún tipo de consecuencias para mí.

Por último, he sido informado que puedo pedir mayor información del estudio al investigador, **Dr. Ricardo Cartes**, escribiéndole a su correo rcartes@udec.cl.

A partir de los antecedentes antes mencionados acepto voluntariamente participar en este estudio.

Nombre del participante (Adulto) \_\_\_\_\_ RUT: \_\_\_\_\_

Nombre del participante (Preescolar) \_\_\_\_\_ RUT: \_\_\_\_\_

Firma del participante \_\_\_\_\_

Fecha: \_\_\_\_\_

**Notas:**

Usted se quedará con una copia de este consentimiento como garantía de las condiciones de su participación.

Si usted siente que sus derechos fueron vulnerados en este estudio puede comunicarse con el Comité de Bioética de la Facultad de Medicina de la Universidad de Concepción, escribiéndole a Liliana Ortiz al correo lilianaortiz@udec.cl o llamándole al fono (41) 2207083.

*Si desea recibir un resumen ejecutivo de los resultados del estudio una vez que éste se encuentre terminado, indique su dirección de correo electrónico, o, si no posee una, indique su dirección de correo postal:*

Correo electrónico: \_\_\_\_\_

**Equipo investigador**

**PARTE II: Formulario de Consentimiento**

He sido invitado(a) a participar en una investigación, enmarcada en el proyecto FONIS N° SA14ID0162 titulado ***“Evaluación de una intervención de promoción en salud bucal desarrollada en el núcleo familiar de preescolares en sectores vulnerables urbanos. San Pedro de la Paz y Talcahuano. Ensayo comunitario. percepción del Clima académico en el ciclo clínico de Odontología de la UdeC”***, cuyo investigador es el Dr. Ricardo Cartes y que tiene como objetivo determinar el impacto en los conocimientos y salud bucal de una intervención de promoción en salud bucal desarrollada en el núcleo familiar de preescolares en el sector de Boca Sur de San Pedro de la Paz en comparación a un grupo control en el sector Los Cerros de Talcahuano.

Por este motivo, se requiere mi participación respondiendo encuestas y completando un examen de salud bucal al inicio y al término del proyecto, así como participando en 4 a 6 intervenciones de promoción en mi hogar.

Asimismo, declaro que se me informó que mi participación será de carácter voluntario y mediado por un proceso de consentimiento informado. Para poder parear mis respuestas de las distintas, se solicita que me identifique con mi RUT al inicio de cada instrumento. No obstante, los investigadores se comprometen a que la información que entregaré en estos instrumentos sólo será utilizada para responder a los objetivos de este estudio, será confidencial, que los datos serán manejados exclusivamente por los investigadores, almacenados en ordenadores resguardados con clave y que en ningún caso serán analizados individualmente, pues a este estudio sólo le interesan el efecto a nivel general de la intervención en promoción.

En este mismo sentido, sólo se me hará entrega, si lo solicito, de un resumen ejecutivo con los resultados generales del estudio sin identificar a los participantes.

También se me ha garantizado que el estudio no implica exponerme a situaciones que atenten en contra de mi bienestar físico o mental y que no perjudicará mi atención en salud.

Si en algún momento siento que el proceso de encuestaje me incomoda puedo solicitar que se detenga inmediatamente la recolección.

Estoy al tanto que la participación que se me solicita es voluntaria, que no recibiré pago alguno por mi colaboración y que puedo negarme a participar o retirarme en cualquier etapa de la investigación, sin necesidad de dar explicaciones y que esto no tendrá ningún tipo de consecuencias para mí.

Por último, he sido informado que puedo pedir mayor información del estudio al investigador, **Dr. Ricardo Cartes**, escribiéndole a su correo [rcartes@udec.cl](mailto:rcartes@udec.cl).

A partir de los antecedentes antes mencionados acepto voluntariamente participar en este estudio.

Nombre del participante (Adulto) \_\_\_\_\_ RUT: \_\_\_\_\_

Nombre del participante (Preescolar) \_\_\_\_\_ RUT: \_\_\_\_\_

Firma del participante \_\_\_\_\_

Fecha: \_\_\_\_\_

**Notas:**

Usted se quedará con una copia de este consentimiento como garantía de las condiciones de su participación.

Si usted siente que sus derechos fueron vulnerados en este estudio puede comunicarse con el Comité de Bioética de la Facultad de Medicina de la Universidad de Concepción, escribiéndole a Liliana Ortiz al correo [lilianaortiz@udec.cl](mailto:lilianaortiz@udec.cl) o llamándole al fono (41) 2207083.

*Si desea recibir un resumen ejecutivo de los resultados del estudio una vez que éste se encuentre terminado, indique su dirección de correo electrónico, o, si no posee una, indique su dirección de correo postal:*

Correo electrónico: \_\_\_\_\_

**Equipo investigador**
